# Supplementary material for: Mental health outcomes and associated factors among healthcare workers in Douala, Cameroon: a cross-sectional study
Source: Research Square preprint supplement (doi:10.21203/rs.3.rs-8499566/v1), 2026-01-12
Supplement: Supplementary file 1 [file 3002edbc7f893decdcc01557.docx]

**Questionnaire: Assessment of Mental Health Disorders and Determinants Among Healthcare Workers in Douala, Cameroon**

This questionnaire was self-administered and available in **English and French**. It comprised **two main sections**: socio-demographic and occupational characteristics, and validated mental health scales.

Dear Participant,

Thank you for agreeing to take part in this study. Participation is voluntary, and all responses will remain confidential and used strictly for research purposes.
Please tick (✓) the option that best applies to you.

## Section A: Socio-demographic and Occupational Characteristics

1. Age (years): ☐ <25 ☐ 25–34 ☐ 35–44 ☐ ≥45

2. Sex: ☐ Male ☐ Female

3. Marital status: ☐ Single ☐ Married

4. Highest level of education attained: ☐ Technician ☐ Specialist ☐ Postgraduate

5. Professional cadre: ☐ Nurse ☐ Physician ☐ Laboratory technician ☐ Other allied health staff

6. Type of health facility: ☐ Public ☐ Private

7. Unit / department of assignment: ☐ ICU ☐ PCU ☐ Laboratory ☐ Other clinical unit

8. Average weekly working hours: ☐ 40–79 ☐ 80–120 ☐ >120

9. Monthly income level: ☐ Low ☐ Medium ☐ High

10. Self-rated job performance over the past month: ☐ Very poor ☐ Poor ☐ Good ☐ Very good

## Section B: Patient Health Questionnaire-9 (PHQ-9)

Instruction: Over the last two weeks, how often have you been bothered by the following problems?

Response options: 0 = Not at all | 1 = Several days | 2 = More than half the days | 3 = Nearly every day

| Item | Question |
| --- | --- |
| 1 | Little interest or pleasure in doing things |
| 2 | Feeling down, depressed, or hopeless |
| 3 | Trouble falling or staying asleep, or sleeping too much |
| 4 | Feeling tired or having little energy |
| 5 | Poor appetite or overeating |
| 6 | Feeling bad about yourself or that you are a failure |
| 7 | Trouble concentrating on things |
| 8 | Moving or speaking slowly or being restless |
| 9 | Thoughts of being better off dead or of hurting yourself |

## Section C: Generalized Anxiety Disorder-7 (GAD-7)

Instruction: Over the last two weeks, how often have you been bothered by the following problems?

Response options: 0 = Not at all | 1 = Several days | 2 = More than half the days | 3 = Nearly every day

| Item | Question |
| --- | --- |
| 1 | Feeling nervous, anxious, or on edge |
| 2 | Not being able to stop or control worrying |
| 3 | Worrying too much about different things |
| 4 | Trouble relaxing |
| 5 | Being so restless that it is hard to sit still |
| 6 | Becoming easily annoyed or irritable |
| 7 | Feeling afraid as if something awful might happen |

## Section D: Perceived Stress Scale-10 (PSS-10)

Instruction: Over the last one month, how often have you been bothered by the following problems?

Response options: 0 = Never | 1 = Almost never | 2 = Sometimes | 3 = Fairly often | 4 = Very often

| Item | Question |
| --- | --- |
| 1 | Felt upset because of something unexpected |
| 2 | Felt unable to control important things in your life |
| 3 | Felt nervous and stressed |
| 4 | Felt confident about your ability to handle personal problems* |
| 5 | Felt that things were going your way* |
| 6 | Felt unable to cope with all the things you had to do |
| 7 | Been able to control irritations in your life* |
| 8 | Felt that you were on top of things* |
| 9 | Felt angered because of things outside your control |
| 10 | Felt difficulties were piling up so high that you could not overcome them |

* Positively worded items are reverse-scored.
